# Supplementary material for: Microbial Populations in Ruminal Liquid Samples from Young Beefmaster Bulls at Both Extremes of RFI Values
Source: MDPI journal article supplement (doi:10.3390/microorganisms11030663), 2023-03-06
Supplement: s1 [file s1]

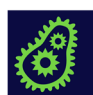

# Microbial Populations in Ruminant Liquid Samples from Beefmaster Steers at Both Extremes of RFI Values

Nelson Manzanares-Miranda <sup>1,†</sup>, Jose F. Garcia-Mazcorro <sup>2,†</sup>, Eduardo B. Pérez-Medina <sup>2</sup>, Anakaren Vaquera-Vázquez <sup>3</sup>, Alejandro Martínez-Ruiz <sup>3</sup>, Yarellys Ramos-Zayas <sup>2,4</sup> and Jorge R. Kawas <sup>4,5,\*</sup>

<sup>1</sup> Centro de Investigación en Producción Agropecuaria (CIPA), Universidad Autónoma de Nuevo León (UANL), Linares 67700, Mexico

<sup>2</sup> Research and Development, MNA de Mexico, San Nicolas de los Garza 66477, Mexico

<sup>3</sup> Laboratorio de Biología Molecular, Laboratorio Central Regional del Norte (LCRN), Guadalupe 67100, Mexico

<sup>4</sup> Posgrado Conjunto Agronomía-Veterinaria, UANL, General Escobedo 66054, Mexico

<sup>5</sup> Facultad de Agronomía, UANL, General Escobedo 66054, Mexico

\* Correspondence: jorge.kawasgr@uanl.edu.mx

† These authors contributed equally to this work.

## 1. Centered log-ratio (clr) transformation

As mentioned in the main text, the relative proportions of 16S reads have historically been the data of choice to perform comparisons of microbial taxa in studies of gut microbiota in ruminants and other animal species. However, it is well known that relative abundance can lead to spurious correlations, originally pointed out by Pearson more than a century ago (Pearson, 1896). The issue with the analysis of relative abundance has been discussed by contemporary researchers (Holmes et al. 2012; Fernandes et al. 2014; Mandal et al. 2015; Gloor and Reid 2016; Morton et al. 2019), and many methods and approaches have been implemented to deal with this issue (Nearing et al. 2022). Here, we focus on the centered log-ratio (clr) transformation (Moossavi et al. 2019).

There are at least two packages in R that can perform centered log-ratio (clr) transformation, the rgr and the compositions packages. Note that, unlike ANCOM (Mandal et al. 2015), available in the composition plugin in QIIME2 (<https://docs.qiime2.org/2022.2/plugins/available/composition/>), clr transformation in the rgr package is performed on the raw data not on the relative abundance (<https://search.r-project.org/CRAN/refmans/rgr/html/clr.html>). We think this is more appropriate because, as we showed above, the relative abundances contain data that do not necessarily reflect the nature of the original data.

Our analyses using both the rgr and the compositions packages in R showed that these transformations produce the same results when analyzing a full data set or fractions of the data set. In other words, the clr transformations in these packages seem not to take into consideration the number of samples. Also, these methods do not accept samples that contain any 0, which are common in 16S sequencing analyses that may or may not reflect true absence of the taxon in the environment (even a total of 500,000 16S sequences from a sample can fall short from 100 mg of intestinal contents containing  $\sim 1 \times 10^{11}$  microbes per gram, Sender et al. 2016). On the other hand, our analysis showed that the formula for clr transformation [ $\text{clr} \leftarrow \text{apply}(\log_2(\text{data} + 0.5), 2, \text{function}(x) \ x - \text{mean}(x))$ ], explained in a tutorial from the QIIME2 forum (Bisanz 2018), produce different results depending on the number of samples. We think this is important because some researchers may want to explore the analysis of subsets of their data sets, for various reasons. It is important to point out that there is a perfect relationship between the sequence counts and the corresponding clr transformed data for each taxon when using the formula above, but not with the clr transformation provided by the R packages.

**Citation:** Manzanares-Miranda, N.; Garcia-Mazcorro, J.F.; Pérez-Medina, E.B.; Vaquera-Vázquez, A.; Martínez-Ruiz, A.; Ramos-Zayas, Y.; Kawas, J.R. Microbial Populations in Ruminant Liquid Samples from Beefmaster Steers at Both Extremes of RFI Values. *Microorganisms* **2023**, *11*, 663. <https://doi.org/10.3390/microorganisms11030663>

Academic Editor: Todd Riley Callaway

Received: 17 January 2023

Revised: 14 February 2023

Accepted: 1 March 2023

Published: 6 March 2023

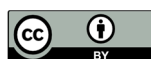

**Copyright:** © 2023 by the authors. Licensee MDPI, Basel, Switzerland. This article is an open access article distributed under the terms and conditions of the Creative Commons Attribution (CC BY) license (<https://creativecommons.org/licenses/by/4.0/>).

## 2. Diet used during feed efficiency test

**Table S1.** Diet used during feed efficiency test.

| <b>Ingredient</b>                   | <b>Composition (g/kg)</b> |
|-------------------------------------|---------------------------|
| Ground corn                         | 500                       |
| Klein grass hay                     | 160                       |
| Distillers dried grains             | 100                       |
| Cane molasses <sup>1</sup>          | 80                        |
| Soybean meal                        | 75                        |
| Whole cottonseed                    | 60                        |
| Calcium carbonate                   | 13.2                      |
| Urea                                | 5.3                       |
| Salt                                | 4                         |
| Mineral-vitamin premix <sup>2</sup> | 2.5                       |

<sup>1</sup> Cane molasses:water mix (50:50). <sup>2</sup> Trace minerals (Mn, 17,000 mg/kg; Zn, 34,000 mg/kg; Cu, 3,400 mg/kg; I, 170 mg/kg; Co, 68 mg/kg; Se, 102 mg/kg); vitamin A (880,000 I.U./kg), vitamin E (20,000 I.U./kg), and sodium monensin (12 mg/kg).

## 3. Variation analysis

We calculated the variation between time points, DNA extraction methods, and RFI groups, using both the relative abundance of taxa and the clr-transformed data at the phylum level. With the exception of Tenericutes, this analysis showed that the variation in microbial abundance was always higher between DNA extraction methods compared to the variation between days of sampling and between high (LRFI) and low (HRFI) efficiency animals.

**Table S2.** Standard deviation values obtained from two average values corresponding to 2 time points, 2 DNA extraction methods, and 2 RFI groups <sup>1</sup>.

| <b>Taxon</b>       | <b>Time points</b> | <b>DNA extraction methods</b> | <b>RFI groups</b> |
|--------------------|--------------------|-------------------------------|-------------------|
| Actinobacteria     | 0.21               | 0.64                          | 0.01              |
| Actinobacteria_clr | 0.34               | 1.33                          | 0.35              |
| Bacteroidetes      | 0.45               | 5.6                           | 3.6               |
| Bacteroidetes_clr  | 0.06               | 0.29                          | 0.03              |
| Chloroflexi        | 0.03               | 0.10                          | 0.07              |
| Chloroflexi_clr    | 0.28               | 1.37                          | 1.19              |
| Cyanobacteria      | 0.22               | 0.86                          | 0.26              |
| Cyanobacteria_clr  | 0.21               | 1.74                          | 0.37              |
| Elusimicrobia      | 0.01               | 0.25                          | 0.12              |
| Elusimicrobia_clr  | 0.25               | 2.28                          | 1.03              |
| Euryarchaeota      | 0.19               | 0.76                          | 0.35              |
| Euryarchaeota_clr  | 0.36               | 1.28                          | 0.32              |
| Fibrobacteres      | 0.06               | 0.63                          | 0.07              |
| Fibrobacteres_clr  | 0.45               | 3.61                          | 0.04              |
| Firmicutes         | 0.13               | 8.4                           | 2.9               |
| Firmicutes_clr     | 0.06               | 0.44                          | 0.11              |
| Lentisphaerae      | 0.04               | 0.07                          | 0.02              |
| Lentisphaerae_clr  | 0.36               | 0.84                          | 0.09              |
| Planctomycetes     | 0.18               | 0.65                          | 0.16              |
| Planctomycetes_clr | 0.25               | 1.08                          | 0.11              |
| Proteobacteria     | 0.35               | 1.5                           | 0.89              |

|                       |      |      |      |
|-----------------------|------|------|------|
| Proteobacteria_clr    | 0.35 | 0.89 | 0.21 |
| Spirochaetes          | 0.16 | 2.5  | 0.10 |
| Spirochaetes_clr      | 0.23 | 1.95 | 0.52 |
| SR1                   | 0.02 | 0.20 | 0.13 |
| SR1_clr               | 0.21 | 2.22 | 0.88 |
| Synergistetes         | 0.03 | 0.08 | 0.03 |
| Synergistetes_clr     | 0.05 | 0.56 | 0.32 |
| Tenericutes           | 0.22 | 0.07 | 0.20 |
| Tenericutes_clr       | 0.38 | 0.09 | 0.38 |
| TM7                   | 0.28 | 1.4  | 0.86 |
| TM7_clr               | 0.12 | 0.51 | 0.67 |
| Unassigned phylum     | 0.08 | 1.2  | 0.29 |
| Unassigned phylum_clr | 0.05 | 0.76 | 0.18 |
| Verrucomicrobia       | 0.27 | 0.60 | 0.27 |
| Verrucomicrobia_clr   | 0.14 | 0.18 | 0.14 |

1 For each taxon, we calculated the average relative abundance using all measurements at each time point, DNA extraction method, and RFI groups (20 measurements were used for each subgroup). The standard deviations in this Table were calculated using those two average values. The same procedure was performed using clr-transformed data. The only taxon that did not show higher standard deviation from the two DNA extraction methods using both the relative abundance and the clr-transformed data was Tenericutes (highlighted in gray).

#### 4. Differences in microbial abundances between LRFI and HRFI

The raw number of 16S sequences were transformed using the formula  $[\text{clr} \leftarrow \text{apply}(\log_2(\text{data} + 0.5), 2, \text{function}(x) \times \text{mean}(x))]$  as explained above, and the clr-transformed data was used to perform statistical comparisons. Table S2 to S4 show a summary of statistical results at the class, order, and genus level, respectively.

**Table S3.** Summary of statistical results (*p*-values) at the class level.<sup>1</sup>

| Class                             | Time points | DNA extraction methods | RFI groups |
|-----------------------------------|-------------|------------------------|------------|
| Actinobacteria (unassigned class) | 0.2699      | 0.0075                 | 0.2068     |
| Alphaproteobacteria               | 0.8632      | 0.6694                 | 0.1045     |
| Anaerolineae                      | 0.4963      | 0.0020                 | 0.0059     |
| Bacilli                           | 0.2828      | 0.6502                 | 0.0483     |
| Bacteria (unassigned phylum)      | 0.8166      | 0.0012                 | 0.4094     |
| Bacteroidia                       | 0.7190      | 0.1642                 | 0.8513     |
| Bacteroidetes (unassigned class)  | 0.9871      | 0.1591                 | 0.5163     |
| Betaproteobacteria                | 0.4443      | <0.0001                | 0.6722     |
| Chloroplast <sup>2</sup>          | NA          | NA                     | NA         |
| Clostridia                        | 0.7734      | 0.0005                 | 0.5373     |
| Coriobacteriia                    | 0.1762      | <0.0001                | 0.2174     |
| Deltaproteobacteria               | 0.4492      | 0.3528                 | 0.4589     |
| Elusimicrobia                     | 0.5559      | <0.0001                | 0.3710     |
| Endomicrobia <sup>2</sup>         | NA          | NA                     | NA         |
| Epsilonproteobacteria             | 0.9730      | <0.0001                | 0.4977     |
| Erysipelotrichi                   | 0.5833      | 0.0319                 | 0.5407     |
| Fibrobacteria                     | 0.3888      | <0.0001                | 0.9421     |
| Firmicutes (unassigned class)     | 0.7646      | <0.0001                | 0.3460     |
| Flavobacteriia <sup>3</sup>       | 0.9556      | <0.0001                | 0.6111     |

|                                     | NP ( $p = \text{NS}$ ) | NP ( $<0.001$ ) | NP ( $p = \text{NS}$ ) |
|-------------------------------------|------------------------|-----------------|------------------------|
| Gammaproteobacteria                 | 0.2997                 | 0.0001          | 0.2498                 |
| Lentisphaeria                       | 0.4119                 | 0.0579          | 0.8404                 |
| Methanobacteria                     | 0.2126                 | $<0.0001$       | 0.2421                 |
| Mollicutes                          | 0.1650                 | 0.7420          | 0.3420                 |
| OD1 (unassigned class) <sup>2</sup> | NA                     | NA              | NA                     |
| Opitutae <sup>2</sup>               | NA                     | NA              | NA                     |
| Planctomycetes <sup>2</sup>         | NA                     | NA              | NA                     |
| Planctomycetia                      | 0.2728                 | $<0.0001$       | 0.6461                 |
| Proteobacteria (unassigned class)   | 0.6639                 | 0.2088          | 0.7896                 |
| Spirochaetes                        | 0.4740                 | $<0.0001$       | 0.1146                 |
| SR1 (unassigned class)              | 0.6005                 | $<0.0001$       | 0.0338                 |
| Synergistia                         | 0.8530                 | 0.0369          | 0.2161                 |
| Thermoplasmata <sup>2</sup>         | NA                     | NA              | NA                     |
| TM7-3                               | 0.7447                 | 0.1730          | 0.0731                 |
| Unassigned <sup>2</sup>             | NA                     | NA              | NA                     |
| Verruco-5                           | 0.4920                 | 0.5161          | 0.6316                 |
| 4C0d2 (Cyanobacteria)               | 0.6343                 | $<0.0001$       | 0.4225                 |

<sup>1</sup> We used PROC MIXED in SAS University Edition using the clr-transformed data from each taxon as dependent variable, and Day of Sampling, DNA extraction method, and RFI, as independent variables, without random effects. <sup>2</sup> Statistical analysis not performed because of the presence of 20 or more samples ( $>50\%$ ) with the same value, resulting from clr transformation of 0's. 3Residuals not normally distributed. NP: non-parametric analysis, NS: non-significant ( $p > 0.05$ ).

**Table S4.** Summary of statistical results ( $p$ -values) at the order level.<sup>1</sup>

| Order                            | Time points            | DNA extraction methods | RFI groups             |
|----------------------------------|------------------------|------------------------|------------------------|
| Actinomycetales                  | 0.2869                 | 0.0108                 | 0.2142                 |
| Aeromonadales                    | 0.3896                 | 0.0001                 | 0.4258                 |
| Alphaproteobacteria              | 0.5496                 | 0.0021                 | 0.7941                 |
| Anaerolineales                   | 0.4963                 | 0.0020                 | 0.0059                 |
| Bacteria (unassigned order)      | 0.8166                 | 0.0012                 | 0.4094                 |
| Bacteroidales <sup>2</sup>       | 0.7190                 | 0.1642                 | 0.8513                 |
| Bacteroidetes (unassigned order) | 0.9871                 | 0.1591                 | 0.5163                 |
| Campylobacteriales <sup>2</sup>  | 0.9730                 | $<0.0001$              | 0.4977                 |
|                                  | NP ( $p = \text{NS}$ ) | NP ( $<0.0001$ )       | NP ( $p = \text{NS}$ ) |
| Clostridiales                    | 0.7716                 | 0.0005                 | 0.5366                 |
| Coriobacteriales                 | 0.1762                 | $<0.0001$              | 0.2174                 |
| CW040 (TM7)                      | 0.7447                 | 0.1730                 | 0.0731                 |
| Desulfovibrionales               | 0.7143                 | 0.6129                 | 0.8524                 |
| Elusimicrobiales                 | 0.5559                 | $<0.0001$              | 0.3710                 |
| Erysipelotrichales               | 0.5833                 | 0.0319                 | 0.5407                 |
| Fibrobacterales                  | 0.3888                 | $<0.0001$              | 0.9421                 |
| Firmicutes (unassigned order)    | 0.7646                 | $<0.0001$              | 0.3460                 |
| Flavobacteriales <sup>2</sup>    | 0.9556                 | $<0.0001$              | 0.6111                 |
|                                  | NP ( $p = \text{NS}$ ) | NP ( $<0.0001$ )       | NP ( $p = \text{NS}$ ) |
| Gammaproteobacteria              | 0.8686                 | 0.0414                 | 0.4152                 |
| Lactobacillales                  | 0.1600                 | 0.4156                 | 0.0422                 |

|                                                |                     |                     |                     |
|------------------------------------------------|---------------------|---------------------|---------------------|
| Methanobacteriales                             | 0.2126              | <0.0001             | 0.2421              |
| Mycoplasmatales                                | 0.8647              | 0.1578              | 0.3185              |
| Pirellulales                                   | 0.2676              | <0.0001             | 0.5400              |
| Planctomycetia <sup>2</sup>                    | 0.3929              | 0.4248              | 0.2589              |
|                                                | NP ( <i>p</i> = NS) | NP ( <i>p</i> = NS) | NP ( <i>p</i> = NS) |
| Proteobacteria (unassigned order) <sup>2</sup> | 0.6639              | 0.2088              | 0.7896              |
|                                                | NP ( <i>p</i> = NS) | NP ( <i>p</i> = NS) | NP ( <i>p</i> = NS) |
| SR1                                            | 0.6005              | <0.0001             | 0.0338              |
| RF32                                           | 0.8552              | <0.0001             | 0.0069              |
| RF39                                           | 0.1437              | 0.3596              | 0.2903              |
| Rhizobiales                                    | 0.6572              | <0.0001             | 0.9995              |
| Rhodospirillales                               | 0.1754              | 0.2827              | 0.0160              |
| Spirochaetales                                 | 0.4987              | <0.0001             | 0.1383              |
| Synergistales                                  | 0.8530              | 0.0369              | 0.2161              |
|                                                | 0.9230              | 0.0005              | 0.6017              |
| Victivallales <sup>2</sup>                     | NP ( <i>p</i> = NS) | NP (<0.005)         | NP ( <i>p</i> = NS) |
| WCHB141                                        | 0.4920              | 0.5161              | 0.6316              |
| YS2                                            | 0.6343              | <0.0001             | 0.4225              |
| Z20                                            | 0.5161              | 0.0183              | 0.8541              |

<sup>1</sup> We used PROC MIXED in SAS University Edition using the clr-transformed data from each taxon as dependent variable, and Day of Sampling, DNA extraction method, and RFI, as independent variables, without random effects. <sup>2</sup> Residuals not normally distributed. A total of 21 taxa were not analyzed because of the presence of 20 or more samples ( $\geq 50\%$ ) with the same value, resulting from clr transformation of 0's (not shown in this table).

**Table S5.** Summary of statistical results (*p*-values) at the genus level organized by phylum.<sup>1</sup>

| Genus (or other level in case of unassigned genus)          | Time points | DNA extraction method | RFI groups |
|-------------------------------------------------------------|-------------|-----------------------|------------|
| <b>Actinobacteria</b>                                       |             |                       |            |
| <i>Brooklawia</i>                                           | 0.2999      | 0.0209                | 0.2865     |
| Family Coriobacteriaceae (unassigned genus) <sup>2</sup>    | 0.2026      | <0.0001               | 0.8036     |
| Family Coriobacteriaceae (unassigned genus) <sup>2</sup>    | 0.5589      | <0.0001               | 0.4996     |
| Family Propionibacteriaceae (unassigned genus) <sup>2</sup> | 0.7009      | 0.1138                | 0.1665     |
| <i>Olsenella</i>                                            | 0.2181      | 0.0018                | 0.5642     |
| <b>Bacteroidetes</b>                                        |             |                       |            |
| <i>Aureimonas</i>                                           | 0.5471      | <0.0001               | 0.3176     |
| Bacteroidetes (unassigned genus) <sup>2</sup>               | 0.9871      | 0.1591                | 0.5163     |
| BS11 (Bacteroidetes)                                        | 0.7732      | 0.0003                | 0.0021     |
| CF231 (Bacteroidetes)                                       | 0.6653      | 0.0007                | 0.1996     |
| Family Flavobacteriaceae (unassigned genus) <sup>2</sup>    | 0.5065      | <0.0001               | 0.6760     |
| Family Paraprevotellaceae (unassigned genus)                | 0.6600      | 0.0096                | 0.0567     |
| Family Paraprevotellaceae (unassigned genus)                | 0.5164      | 0.7275                | 0.6610     |
| Family Prevotellaceae (unassigned genus)                    | 0.9666      | 0.0090                | 0.1212     |
| Family RF16 (unassigned genus)                              | 0.8892      | <0.0001               | 0.0904     |
| Family S24-7 (unassigned genus, Bacteroidetes)              | 0.7296      | 0.2016                | 0.0511     |
| Order Bacteroidales (unassigned genus)                      | 0.7721      | <0.0001               | 0.2146     |
| Order Bacteroidales (unassigned genus)                      | 0.6329      | 0.0001                | 0.0421     |
| <i>Prevotella</i> <sup>2</sup>                              | 0.9708      | 0.9711                | 0.6491     |
| YRC22 <sup>2</sup>                                          | 0.7434      | 0.7973                | 0.5283     |
| <b>Chloroflexi</b>                                          |             |                       |            |

|                                                           |        |         |        |
|-----------------------------------------------------------|--------|---------|--------|
| SHD-231 (family Anaerolinaceae)                           | 0.4963 | 0.0020  | 0.0059 |
| <b>Cyanobacteria</b>                                      |        |         |        |
| Order YS2 (unassigned genus)                              | 0.6343 | <0.0001 | 0.4225 |
| <b>Elusimicrobia</b>                                      |        |         |        |
| Family Elusimicrobiaceae (unassigned genus)               | 0.5870 | <0.0001 | 0.4208 |
| <b>Euryarchaeota</b>                                      |        |         |        |
| <i>Methanobrevibacter</i>                                 | 0.2126 | <0.0001 | 0.2421 |
| <b>Fibrobacteres</b>                                      |        |         |        |
| <i>Fibrobacter</i>                                        | 0.4188 | <0.0001 | 0.8986 |
| <b>Firmicutes</b>                                         |        |         |        |
| <i>Anaerorhabdus</i> <sup>2</sup>                         | 0.9285 | 0.6946  | 0.9258 |
| <i>Anaerovibrio</i>                                       | 0.7994 | 0.7566  | 0.0213 |
| <i>Bulleidia</i>                                          | 0.5985 | 0.0108  | 0.2382 |
| <i>Butyrivibrio</i>                                       | 0.5755 | 0.4963  | 0.6620 |
| <i>Clostridium</i> (f. Lachnospiraceae)                   | 0.9259 | 0.9774  | 0.1275 |
| <i>Clostridium</i> (f. Clostridiaceae)                    | 0.1339 | 0.0362  | 0.3363 |
| <i>Clostridium</i> (f. Ruminococcaceae)                   | 0.5560 | 0.1007  | 0.4855 |
| <i>Dialister</i>                                          | 0.3692 | 0.9214  | 0.0141 |
| Family Christensenellaceae (unassigned genus, Firmicutes) | 0.5493 | 0.3561  | 0.0186 |
| Family Erysipelotrichaceae (unassigned genus)             | 0.4634 | 0.8032  | 0.4393 |
| Family Lachnospiraceae (unassigned genus)                 | 0.1673 | <0.0001 | 0.1259 |
| Family Mogibacteriaceae (unassigned genus)                | 0.5086 | 0.9704  | 0.1637 |
| Firmicutes (unassigned genus)                             | 0.7646 | <0.0001 | 0.3460 |
| <i>Marvinbryantia</i> <sup>2</sup>                        | 0.3946 | 0.0001  | 0.2419 |
| <i>Moryella</i> <sup>2</sup>                              | 0.5078 | <0.0001 | 0.4231 |
| Order Clostridiales (unassigned genus)                    | 0.2639 | 0.0001  | 0.1492 |
| Order Clostridiales (unassigned genus)                    | 0.8309 | 0.3056  | 0.1174 |
| <i>Oscillospira</i>                                       | 0.2201 | <0.0001 | 0.2272 |
| p-75-a5 (family Erysipelotrichaceae)                      | 0.4341 | 0.0007  | 0.2731 |
| RFN20 (family Erysipelotrichaceae) <sup>2</sup>           | 0.4028 | <0.0001 | 0.7231 |
| Ruminococcaceae (unassigned genus)                        | 0.4693 | 0.0019  | 0.0538 |
| Ruminococcaceae (unassigned genus)                        | 0.7113 | 0.3873  | 0.5305 |
| <i>Ruminococcus</i>                                       | 0.5957 | 0.1314  | 0.8909 |
| <i>Schwartzia</i>                                         | 0.3115 | 0.4044  | 0.3993 |
| <i>Selenomonas</i>                                        | 0.5023 | 0.0294  | 0.6883 |
| <i>Streptococcus</i>                                      | 0.1600 | 0.4156  | 0.0422 |
| <i>Succiniclasticum</i>                                   | 0.8930 | 0.0993  | 0.0011 |
| Veillonellaceae (unassigned genus)                        | 0.9588 | 0.3575  | 0.4578 |
| Veillonellaceae (unassigned genus)                        | 0.5769 | 0.4875  | 0.1387 |
| <b>Lentisphaerae</b>                                      |        |         |        |
| Family R4-45B (unassigned genus)                          | 0.5161 | 0.0183  | 0.8541 |
| Victivallaceae (unassigned genus) <sup>2</sup>            | 0.9230 | 0.0005  | 0.6017 |
| <b>Planctomycetes</b>                                     |        |         |        |
| Class Planctomycetia (unassigned genus)                   | 0.3929 | 0.4248  | 0.2589 |
| Family Pirellulaceae (unassigned genus)                   | 0.2549 | <0.0001 | 0.6108 |
| <i>Planctomycete</i>                                      | 0.6384 | 0.0089  | 0.1762 |
| <b>Proteobacteria</b>                                     |        |         |        |
| <b>Alphaproteobacteria</b>                                |        |         |        |

|                                                           |        |         |        |
|-----------------------------------------------------------|--------|---------|--------|
| Family Acetobacteraceae (unassigned genus)                | 0.1754 | 0.2827  | 0.0160 |
| Class Alphaproteobacteria (unassigned genus) <sup>2</sup> | 0.5496 | 0.0021  | 0.7941 |
| Order RF32 (unassigned genus)                             | 0.8552 | <0.0001 | 0.0069 |
| Rhizobiales (unassigned genus) <sup>2</sup>               | 0.6572 | <0.0001 | 0.9995 |
| <b>Deltaproteobacteria</b>                                |        |         |        |
| <i>Desulfovibrio</i>                                      | 0.4860 | 0.7426  | 0.3638 |
| <b>Epsilonproteobacteria</b>                              |        |         |        |
| <i>Campylobacter</i> <sup>2</sup>                         | 0.9730 | <0.0001 | 0.4977 |
| <b>Gammaproteobacteria</b>                                |        |         |        |
| Gammaproteobacteria (unassigned genus)                    | 0.8686 | 0.0414  | 0.4152 |
| Order Aeromonadales (unassigned genus)                    | 0.9503 | 0.0251  | 0.0532 |
| <i>Ruminobacter</i>                                       | 0.9151 | 0.5301  | 0.0286 |
| <i>Succinivibrio</i>                                      | 0.9471 | 0.0153  | 0.3308 |
| Succinivibrionaceae (unassigned genus)                    | 0.2491 | 0.0004  | 0.8298 |
| Succinivibrionaceae (unassigned genus)                    | 0.2491 | 0.0004  | 0.8298 |
| Proteobacteria (unassigned genus)                         | 0.6639 | 0.2088  | 0.7896 |
| <b>Spirochaetes</b>                                       |        |         |        |
| Spirochaetaceae (unassigned genus)                        | 0.4071 | <0.0001 | 0.2200 |
| Spirochaetaceae (unassigned genus)                        | 0.4071 | <0.0001 | 0.2200 |
| <i>Treponema</i>                                          | 0.4464 | <0.0001 | 0.1050 |
| <b>SR1</b>                                                |        |         |        |
| SR1 (unassigned genus)                                    | 0.6005 | <0.0001 | 0.0338 |
| <b>Synergistetes</b>                                      |        |         |        |
| <i>Pyramidobacter</i>                                     | 0.6613 | 0.0570  | 0.3432 |
| <b>Tenericutes</b>                                        |        |         |        |
| Family Mycoplasmataceae (unassigned genus) <sup>2</sup>   | 0.8647 | 0.1578  | 0.3185 |
| Order RF39 (unassigned genus)                             | 0.1437 | 0.3596  | 0.2903 |
| <b>TM7</b>                                                |        |         |        |
| Family F16 (unassigned genus)                             | 0.7447 | 0.1730  | 0.0731 |
| <b>Verrucomicrobia</b>                                    |        |         |        |
| Family RFP12 (unassigned genus)                           | 0.4834 | 0.6394  | 0.7809 |
| WCHB1-25 (unassigned genus)                               | 0.6512 | 0.0054  | 0.2855 |
| Order WCHB1-41 (unassigned genus)                         | 0.5013 | 0.0006  | 0.4935 |
| Order WCHB1-41 (unassigned genus) <sup>2</sup>            | 0.9639 | 0.0004  | 0.5196 |

<sup>1</sup> We used PROC MIXED in SAS University Edition using the clr-transformed data from each taxon as dependent variable, and Day of Sampling, DNA extraction method, and RFI, as independent variables, without random effects. <sup>2</sup> Residuals not normally distributed. The few taxa that show statistically significant difference between RFI groups are highlighted in gray.

## References

1. Bisanz J. 2018. Tutorial: Integrating QIIME2 and R for data visualization and analysis using qiime2R (March 2020 Update v.0.99.20). <https://forum.qiime2.org/t/tutorial-integrating-qiime2-and-r-for-data-visualization-and-analysis-using-qiime2r/4121> (accessed on May 2022).
2. Fernandes, A.D.; Reid, J.N.S.; Macklaim, J.M.; McMurrough, T.A.; Edgell, D.R.; Gloor, G.B. Unifying the analysis of high-throughput sequencing datasets: characterizing RNA-seq, 16S rRNA gene sequencing and selective growth experiments by compositional analysis. *Microbiome* 2014, 2, 15.
3. Gloor, G.B.; Reid, G. Compositional analysis: a valid approach to analyze microbiome high-throughput sequencing data. *Can. J. Microbiol.* 2016, 62, 692–703.
4. Holmes, I.; Harris, K.; Quince, C. Dirichlet multinomial mixtures: generative models for microbial metagenomics. *PLoS ONE* 2012, 7(2), e30126.
5. Mandal, S.; Van Treuren, W.; White, R.A.; Eggesbø, M.; Knight, R.; Peddada, S.D. Analysis of composition of microbiomes: a novel method for studying microbial composition. *Microb. Ecol. Health Dis.* 2015, 26, 27663.

6. Moossavi, S.; Sepehri, S.; Robertson, B.; Bode, L.; Goruk, S.; Field, C.J.; Lix, L.M.; de Souza, R.J.; Becker, A.B.; Mandhane, P.J.; et al. Composition and variation of the human milk microbiota are influenced by maternal and early-life factors. *Cell Host & Microbe* 2019, 25, 324–335.
7. Morton, J.T.; Marotz, C.; Washburne, A.; Silverman, J.; Zaramela, L.S.; Edlund, A.; Zengler, K.; Knight, R. Establishing microbial composition measurement standards with reference frames. *Nature Comm.* 2019, 10, 2719.
8. Nearing, J.T.; Douglas, G.M.; Hayes, M.G.; MacDonald, J.; Desai, D.K.; Allward, N.; Jones, C.M.A.; Wright, R.J.; Dhanani, A.S.; Comeau, A.M.; Langille, M.G.I. Microbiome differential abundance methods produce different results across 38 datasets. *Nature Comm.* 2022, 13, 342.
9. Pearson, K. Mathematical contributions to the theory of evolution — on a form of spurious correlation which may arise when indices are used in the measurement of organs. *Proc. R. Soc. Lond.* 1896, 60, 489–498.
10. Sender, R.; Fuchs, S.; Milo, R. Revised estimates for the number of human and bacteria cells in the body. *PLoS Biol* 2016, 14(8), e1002533.

**Disclaimer/Publisher’s Note:** The statements, opinions and data contained in all publications are solely those of the individual author(s) and contributor(s) and not of MDPI and/or the editor(s). MDPI and/or the editor(s) disclaim responsibility for any injury to people or property resulting from any ideas, methods, instructions or products referred to in the content.
